# Supplementary material for: The Paradox of Privatization in Inland Fisheries Management: Lessons from a Traditional System
Source: MDPI journal article supplement (doi:10.3390/su152316273), 2023-11-24
Supplement: s1 [file s1]

Tabel S1. Stakeholders interviewed for the study.

| No | List of Stakeholders Interviewed                                   | Sources Category                               |
|----|--------------------------------------------------------------------|------------------------------------------------|
| 1  | Head of the Fisheries Department, OKI Regency                      | Government and<br>Administrative Entities:     |
| 2  | Secretary of the Fisheries Department, OKI Regency                 |                                                |
| 3  | Head of the Aquaculture Division, OKI Regency Fisheries Department |                                                |
| 4  | Head of Pampangan District                                         |                                                |
| 5  | Head of Bangsal Village                                            |                                                |
| 6  | Head of Pulu Beruang Village                                       |                                                |
| 7  | Fisheries Extension Officer 1                                      |                                                |
| 8  | Fisheries Extension Officer 2                                      |                                                |
| 9  | Fisheries Extension Officer 3                                      |                                                |
| 10 | Fisherman 1                                                        | Fisheries and Aquaculture<br>Practitioner:     |
| 11 | Fisherman 2                                                        |                                                |
| 12 | Auction Winner 1                                                   |                                                |
| 13 | Auction Winner 2                                                   |                                                |
| 14 | Auction Winner 3                                                   |                                                |
| 15 | Fish Cultivator in Open Waters                                     |                                                |
| 16 | Bycatch-based Fishery Product Producers                            |                                                |
| 17 | Member 1 of the Community Fisheries Monitoring Group               |                                                |
| 18 | Member 2 of the Community Fisheries Monitoring Group               |                                                |
| 19 | Director of the Village-Owned Enterprise (BUMDes)                  | Local Community and<br>Village-Level Entities: |
| 20 | Water Transport User                                               |                                                |
| 21 | Buffalo Herder                                                     |                                                |
| 22 | Rice Field Owner 1                                                 |                                                |
| 23 | Rice Field Owner 2                                                 |                                                |
| 24 | Community Member 1                                                 |                                                |
| 25 | Community Member 2                                                 |                                                |
| 26 | Community Leader 1                                                 |                                                |
| 27 | Community Leader 1                                                 |                                                |
| 28 | Cultural Expert                                                    | Academics and Specialists:                     |
| 29 | Former Clan Leader                                                 |                                                |
| 30 | Agrarian Law Expert                                                |                                                |
| 31 | Fisheries Expert                                                   |                                                |
| 32 | Community-Based Natural Resource Management Expert                 |                                                |
| 33 | Conservationist 1                                                  |                                                |
| 34 | Conservationist 2                                                  |                                                |
| 35 | Natural Resource Economics Expert                                  |                                                |
| 36 | Inland Fisheries Expert                                            |                                                |
| 37 | Natural Landscape Expert                                           |                                                |
| 38 | Environmental Journalist                                           | Media and Activism:                            |
| 39 | Environmental Activist 1                                           |                                                |
| 40 | Environmental Activist 2                                           |                                                |

Tabel S2. Stakeholders influence and interests

| No | Actor category                            | Actor's Influence                                                                                                      | Actor's Interest                                                                                                             |
|----|-------------------------------------------|------------------------------------------------------------------------------------------------------------------------|------------------------------------------------------------------------------------------------------------------------------|
| 1  | Provincial Fisheries Service              | Leads and budgets community monitoring group programs and regency fishery office initiatives.                          | Ensuring provincial oversight and regulation of the fisheries sector.                                                        |
| 2  | Head of District                          | Oversees district-level auctions, including recommending and approving auction objects, village programs, and budgets. | Achieving PAD targets without conflicts, and efficiently managing the restocking fund.                                       |
| 3  | Community Empowerment and Village Service | Guides the utilization of village budgets and regulations.                                                             | Facilitating the smooth execution of village programs and fostering village and community development.                       |
| 4  | Regency Fishery Office                    | Serves as the regulator and operator in the regency fisheries sector.                                                  | Meeting PAD targets and fulfilling mandatory responsibilities in fisheries' governance and management.                       |
| 5  | Regional House of Representatives         | Crafts local regulations pertaining to auctions.                                                                       | Upholding populism and electoral politics.                                                                                   |
| 6  | Head of Village                           | Holds formal and informal leadership at the village level, endorsing activities, programs, and budgets.                | Ensuring food security, providing alternative livelihoods for the community, and maintaining electoral stability and legacy. |
| 7  | Auction Winners                           | Hold substantial capital and connections, and often bear traditional authoritative roles.                              | Maintaining continuity of fishing rights, securing low-cost auctions, and attaining high fish yields.                        |
| 8  | Bidder                                    | Possess significant capital and networks, similar to auction winners.                                                  | Winning the auction or receiving compensation from the auction winner for not engaging in the bidding process.               |
| 9  | Fisherman                                 | Maintain capital assets and networks, operating under a patron-client relationship with the auction winner.            | Acquiring fishing spots from the auction winner at a reasonable cost, while ensuring high returns on investment.             |
| 10 | Peasant-Fisherman                         | Work in a patron-client relationship with the auction winner.                                                          | Being employed in the auction object's activities.                                                                           |
| 11 | Buffalo Herders                           | Traditionally rely on pasture-based livelihoods.                                                                       | Ensuring unhindered access to floodplains for buffalo grazing.                                                               |
| 12 | Rice Field Owners                         | Hold legal recognition as landowners.                                                                                  | Protecting their rice crops from disturbances caused by fishermen or buffaloes, while retaining their ownership rights.      |
| 13 | Users of Water Transportation             | Provide essential water transportation services.                                                                       | Operating without disturbances from fishing gear.                                                                            |
| 14 | Fish Cultivator                           | Enhance the economic value of trash fish.                                                                              | Ensuring a consistent supply of affordable trash fish for aquaculture feed.                                                  |
| 15 | Village-Owned Enterprises (VOE)           | Established village organizations with notable organizational and financial capabilities.                              | Receiving training and budget for hatchery activities and securing a guaranteed market for the produced seeds.               |
| 16 | Fishery extension                         | Operate as fishery extension officers.                                                                                 | Conflict-free documentation of input captures.                                                                               |
| 17 | Community Surveillance Group (POKMASWAS)  | Mandated by the Provincial Fisheries Service to oversee fisheries' activities.                                         | Ensuring conflict-free monitoring of fisheries' activities.                                                                  |
| 18 | Non-Governmental Organizations            | Play a significant role in advocating and highlighting social and environmental issues.                                | Addressing conservation and property rights issues.                                                                          |
| 19 | National Research and Innovation Agency   | Offer professional opinions and conduct scientific research.                                                           | Investigating and addressing conservation, economic, and social issues.                                                      |
| 20 | Academics                                 | Provide expert opinions and undertake scientific studies.                                                              | Exploring conservation issues along with economic and social aspects.                                                        |
