# Supplementary material for: The Paradox of Privatization in Inland Fisheries Management: Lessons from a Traditional System
Source: MDPI journal article supplement (doi:10.3390/su152316273), 2023-11-24
Supplement: s1 [file s1]

Archive with 1 entries (1 files):
- sustainability-2697313-supplementary.pdf
